# Supplementary material for: CHD3 and CHD4 recruitment and chromatin remodeling activity at DNA breaks is promoted by early poly(ADP-ribose)-dependent chromatin relaxation
Source: PubMed Central journal article supplement — Nucleic Acids Res. 2018 May 4;46(12):6087–98. doi: 10.1093/nar/gky334 (PMC6158744; doi:10.1093/nar/gky334), 2018-05-04
Supplement: gky334_supplemental_figures.pdf [file gky334_supplemental_figures.pdf]

## SUPPLEMENTARY DATA

### **CHD3 and CHD4 recruitment and chromatin remodeling activity at DNA breaks is promoted by early poly(ADP-ribose)-dependent chromatin relaxation**

Rebecca Smith<sup>1,2</sup>, Hafida Sellou<sup>2,4</sup>, Catherine Chapuis<sup>2</sup>, Sébastien Huet<sup>2,\*</sup> & Gyula Timinszky<sup>1,3,\*</sup>

1 Biomedical Center Munich, Physiological Chemistry, Ludwig-Maximilians-Universität München, 82152 Planegg-Martinsried, Germany. 2 Univ Rennes, CNRS, Structure fédérative de recherche Biosit, IGDR (Institut de génétique et développement de Rennes) - UMR 6290, F- 35000 Rennes, France. 3 MTA SZBK Lendület DNA damage and nuclear dynamics research group, Biological Research Center of the Hungarian Academy of Sciences, 6276 Szeged, Hungary. 4 Present address: Laboratoire de Biologie Moléculaire Eucaryote, Centre de Biologie Intégrative, Université de Toulouse, 31062 Toulouse, France.

\*Correspondence: sebastien.huet@univ-rennes1.fr (S.H.), timinszky.gyula@brc.mta.hu (G.T.)

## SUPPLEMENTARY FIGURE LEGENDS

**Supplementary Figure 1. Late recruitment of CHD4 to sites of DNA damage is not due to slow diffusion of CHD4.** (A) Sketch of the microscope system used for live cell imaging and laser micro-irradiation. The cells are imaged using a spinning-disk confocal setup. The laser micro-irradiation and photoactivation at 405 nm is performed through an independent light path. Within this light path, the single point scanning mirrors allow to define local micro-irradiation / photoactivation areas. (B) Raw images collected before (Pre) and after microirradiation, showing accumulation of GFP-CHD4 and photoactivation of H2B (C) Overview of image analysis pipelines. Time series images of GFP-CHD4 and H2B-PTR are collected and used to segment the nucleus and area of DNA damage respectively. Quantification of the thickness over the line is measured and can be expressed directly in  $\mu\text{m}$  or as a ratio normalized to the 0 s time point. Mean fluorescence of the GFP signal is measured inside the damage area as defined by H2B-PTR segmentation. Fluorescence intensity is normalized to the pre-damage time point. (D) U2OS cells expressing GFP-CHD4 were irradiated with 405 and 488 nm light to simultaneously induce DNA damage in Hoechst sensitized nuclei and bleach GFP. Fluorescence intensity was normalized to pre-bleach images. Sensitized nuclei (Damage, Black) are compared to non-sensitized controls (No Damage, Red).

**Supplemental Figure 2. CHD4 binding is enhanced upon chromatin relaxation and does not directly interact with Alc1.** Chromatin relaxation (A) and CHD4 recruitment (B) 120 s post UV microirradiation in cells over-expressing wild-type Alc1 (WT) or the ATPase-dead (E175Q) mutant. (C) PARP1-mCherry or mCherry-CHD4 were co-expressed with GFP-Alc1 that was tethered to the LacO array using the LacI-GFP-trap. Images are shown before (Pre) and 120 s after (Post) DNA damage induction. Insets show magnification of the LacO array. CHD4 does not localize with LacO-tethered Alc1 either Pre or Post DNA damage induction. In contrast, PARP1 enriches at LacO-tethered

Alc1 after DNA damage induction. **(D)** GFP-CHD4 recruitment to sites of DNA damage in WT (Alc1<sup>+/+</sup>) or Alc1 knockout (Alc1<sup>-/-</sup>) U2OS cells. Images show representative images before (Pre) and 120 s after (Post) DNA damage induction. Scale bars are 5  $\mu$ m. **(E)** FCS curves of GFP-CHD4 before (black) and after (red) UV microirradiation. **(F)** GFP-CHD4 dynamics measured by FCS pre and post DNA damage induction.

**Supplemental Figure 3. CHD4 knockdown enhances DNA damage signaling and does not alter pre-damage chromatin structure.** **(A)** Immunofluorescence showing knockdown efficiency of CHD4 (siCHD4 #1, siCHD4 #2) as compared to scrambled siRNA (siScr). Nuclei were visualized with Hoechst staining. Scale bar is 10  $\mu$ m. **(B)** Immunofluorescence of H2AX-phosphorylation post X-ray induced DNA damage (10 Gy) with siRNA-mediated knockdown of CHD4 (siCHD4 #1, siCHD4 #2, white) compared to scrambled siRNA (siScr, grey). Statistical analysis between Scr and CHD4 knockdown is  $p < 1 \times 10^{-16}$  for each time point. **(C)** Texture analysis of Hoechst stained nuclei with isotonic or hypotonic treatment. A decrease in pixel-to-pixel contrast is indicative of a more relaxed chromatin landscape. **(D)** Effect of DNA damage-induced chromatin relaxation with isotonic or hypotonic treatments. Boxplots show chromatin relaxation 120 s after microirradiation. **(E)** Texture analysis of Hoechst stained nuclei treated with scrambled (siScr) or CHD4 (siCHD4 #1, siCHD4 #2) siRNA.

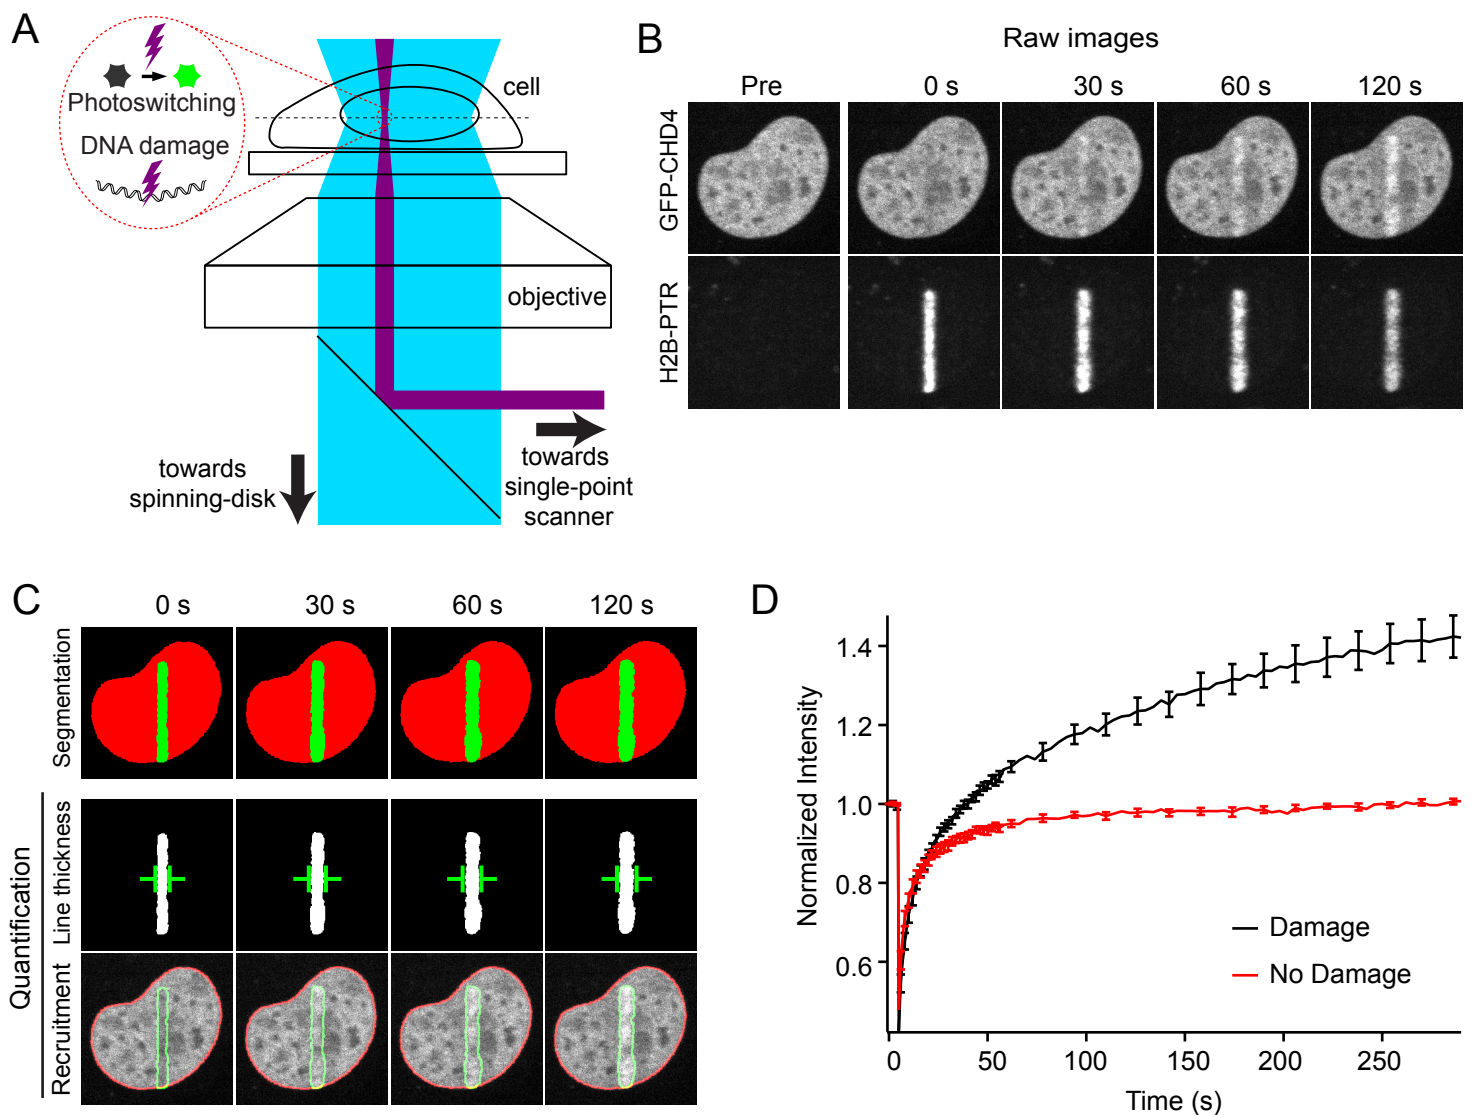

**Supplementary Figure 1. Late recruitment of CHD4 to sites of DNA damage is not due to slow diffusion of CHD4. (A)** Sketch of the microscope system used for live cell imaging and laser micro-irradiation. The cells are imaged using a spinning-disk confocal setup. The laser micro-irradiation and photoactivation at 405 nm is performed through an independent light path. Within this light path, the single point scanning mirrors allow to define local micro-irradiation / photoactivation areas. **(B)** Raw images collected before (Pre) and after microirradiation, showing accumulation of GFP-CHD4 and photoactivation of H2B **(C)** Overview of image analysis pipelines. Time series images of GFP-CHD4 and H2B-PTR are collected and used to segment the nucleus and area of DNA damage respectively. Quantification of the thickness over the line is measured and can be expressed directly in  $\mu\text{m}$  or as a ratio normalized to the 0 s time point. Mean fluorescence of the GFP signal is measured inside the damage area as defined by H2B-PTR segmentation. Fluorescence intensity is normalized to the pre-damage time point. **(D)** U2OS cells expressing GFP-CHD4 were irradiated with 405 and 488 nm light to simultaneously induce DNA damage in Hoechst sensitized nuclei and bleach GFP. Fluorescence intensity was normalized to pre-bleach images. Sensitized nuclei (Damage, Black) are compared to non-sensitized controls (No Damage, Red).

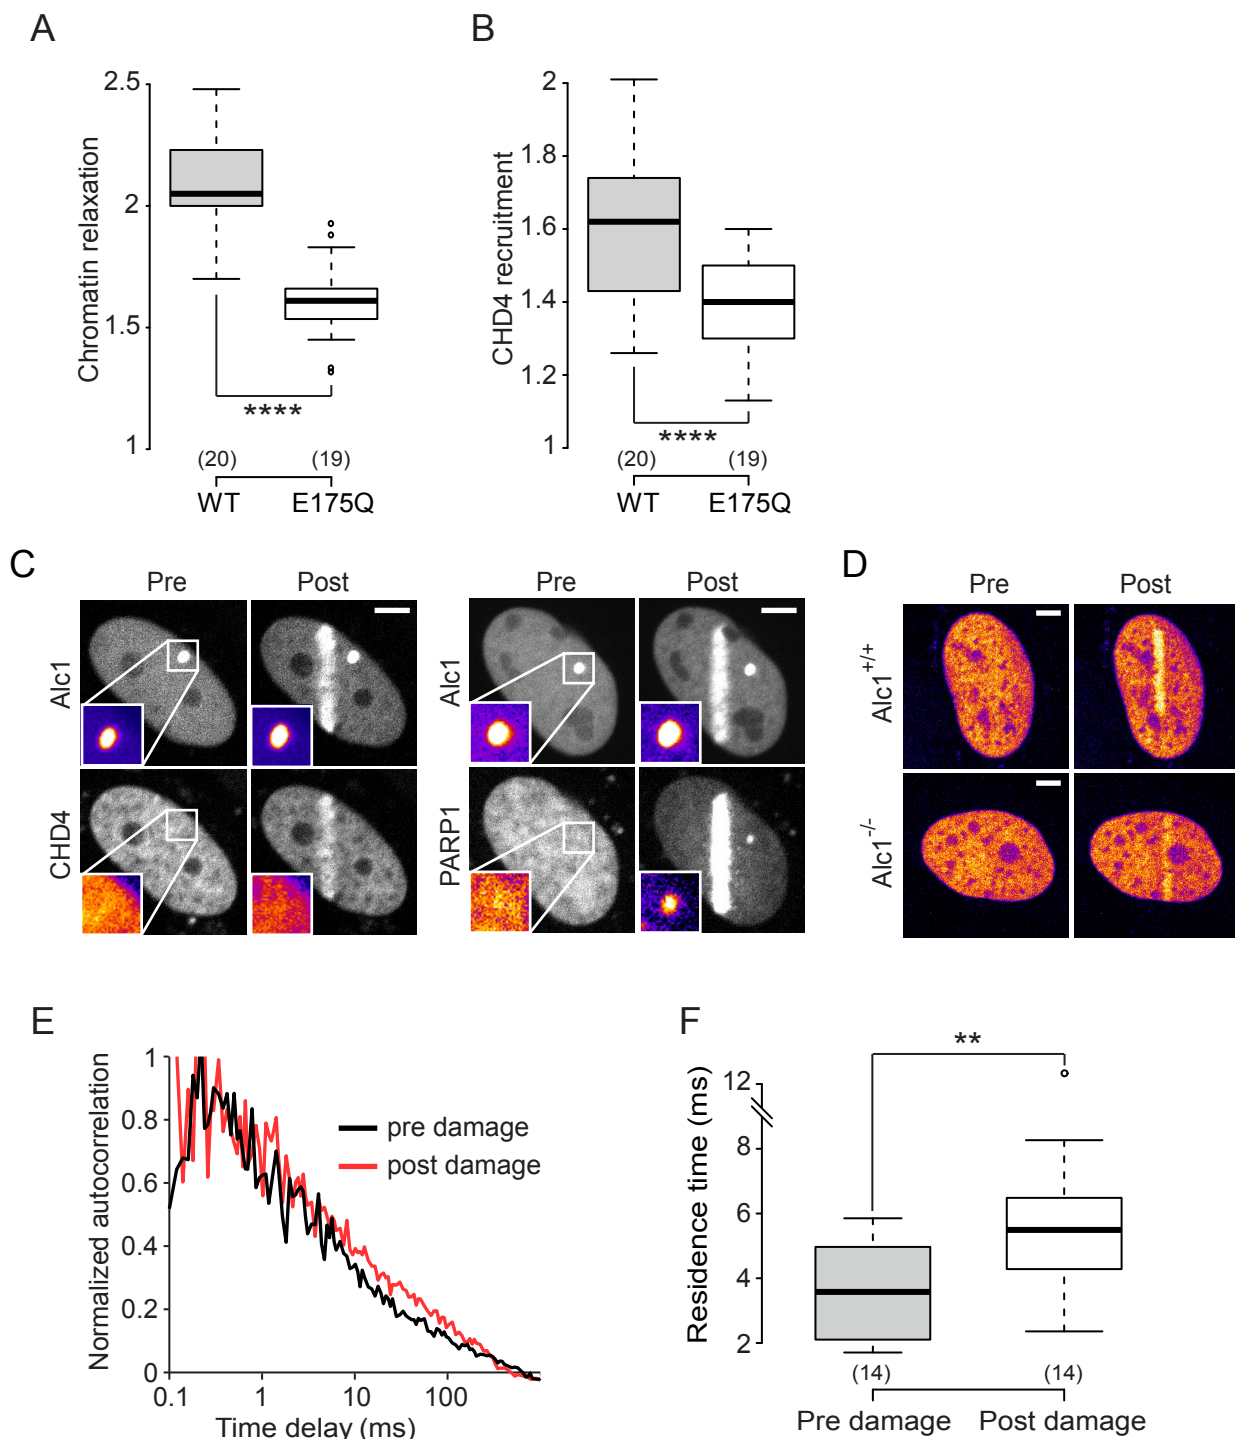

**Supplemental Figure 2. CHD4 binding is enhanced upon chromatin relaxation and does not directly interact with Alc1.** Chromatin relaxation (A) and CHD4 recruitment (B) 120 s post UV microirradiation in cells over-expressing wild-type Alc1 (WT) or the ATPase-dead (E175Q) mutant. (C) PARP1-mCherry or mCherry-CHD4 were co-expressed with GFP-Alc1 that was tethered to the LacO array using the LacI-GFP-trap. Images are shown before (Pre) and 120 s after (Post) DNA damage induction. Insets show magnification of the LacO array. CHD4 does not localize with LacO-tethered Alc1 either Pre or Post DNA damage induction. In contrast, PARP1 enriches at LacO-tethered Alc1 after DNA damage induction. (D) GFP-CHD4 recruitment to sites of DNA damage in WT (Alc1<sup>+/+</sup>) or Alc1 knockout (Alc1<sup>-/-</sup>) U2OS cells. Images show representative images before (Pre) and 120 s after (Post) DNA damage induction. Scale bars are 5  $\mu$ m. (E) FCS curves of GFP-CHD4 before (black) and after (red) UV microirradiation. (F) GFP-CHD4 dynamics measured by FCS pre and post DNA damage induction.

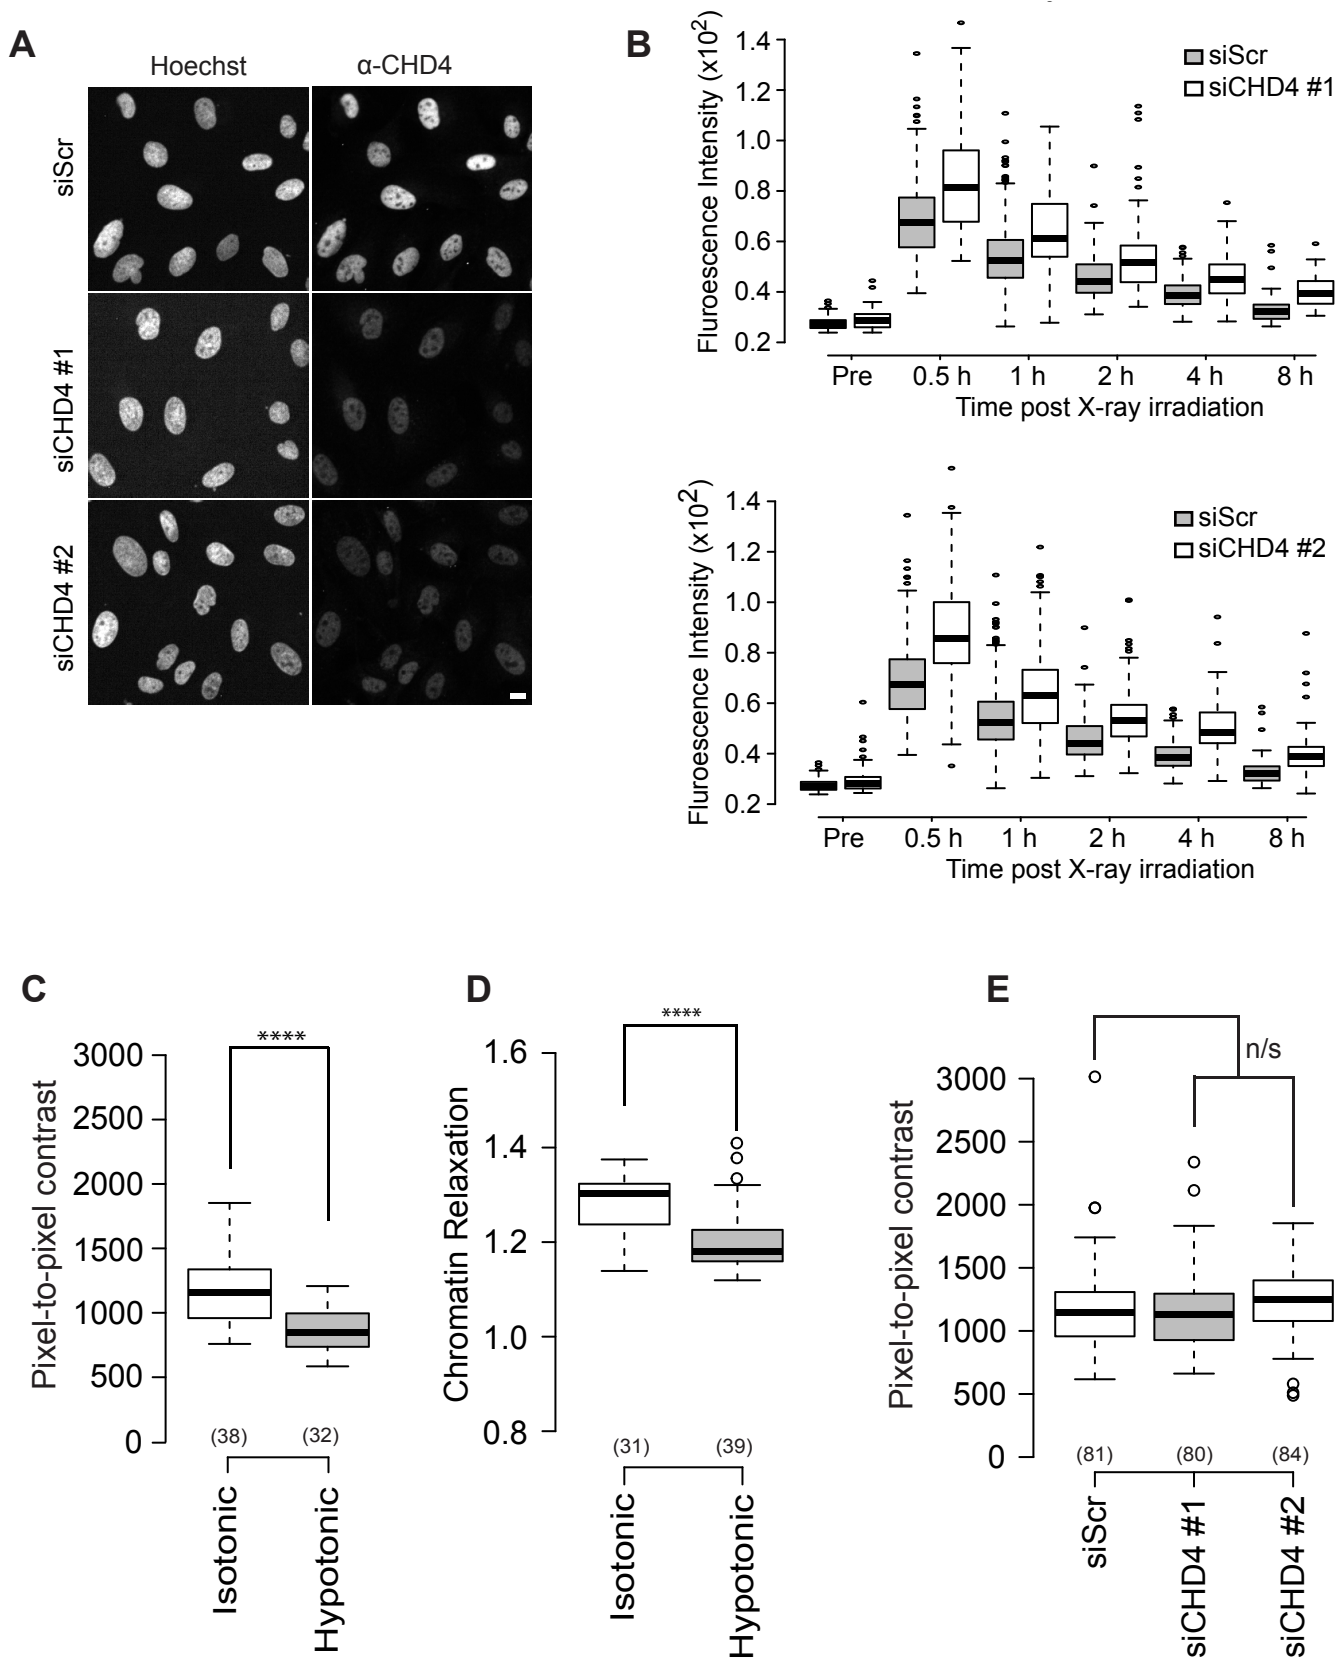

**Supplementary Figure 3. CHD4 knockdown enhances DNA damage signaling and does not alter pre-damage chromatin structure.**

**(A)** Immunofluorescence showing knockdown efficiency of CHD4 (siCHD4 #1, siCHD4 #2) as compared to scrambled siRNA (siScr). Nuclei were visualized with Hoechst staining. Scale bar is 10  $\mu$ m. **(B)** Immunofluorescence of H2AX-phosphorylation post X-ray induced DNA damage (10 Gy) with siRNA-mediated knockdown of CHD4 (siCHD4 #1, siCHD4 #2, white) compared to scrambled siRNA (siScr, grey). Statistical analysis between Scr and CHD4 knockdown is  $p < 1 \times 10^{-16}$  for each time point. **(C)** Texture analysis of Hoechst stained nuclei with isotonic or hypotonic treatment. A decrease in pixel-to-pixel contrast is indicative of a more relaxed chromatin landscape. **(D)** Effect of DNA damage-induced chromatin relaxation with isotonic or hypotonic treatments. Boxplots show chromatin relaxation 120 s after microirradiation. **(E)** Texture analysis of Hoechst stained nuclei treated with scrambled (Scr) or CHD4 (siCHD4 #1, siCHD4 #2) siRNA
